# Supplementary material
Source: Springer Nature journal article supplement (https://www.springermedizin.de/resource/supplementary/12889_2010_2647_MOESM2_ESM.pdf/9486862)

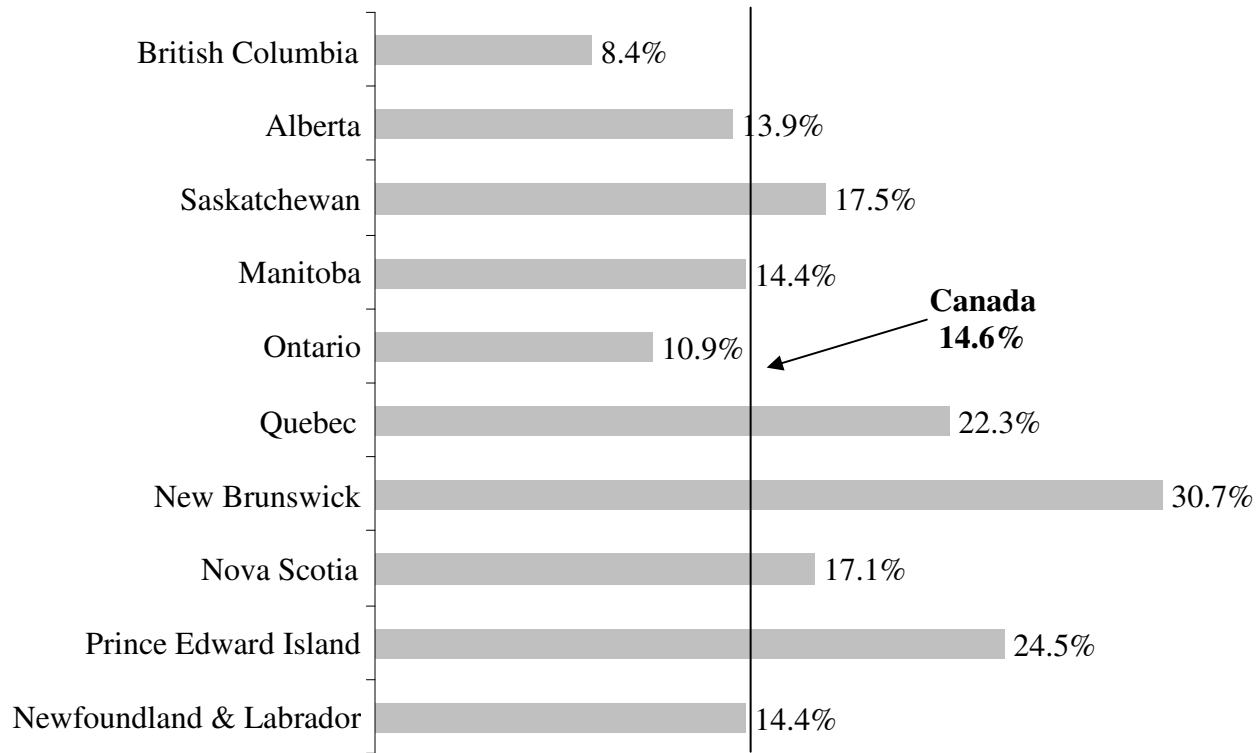

Supplement: MOESM2 [file 9486862]
